# Supplementary material for: Comparative analysis of carotenoid accumulation in two goji (Lycium barbarum L. and L. ruthenicum Murr.) fruits
Source: PubMed Central journal article supplement (PMC4276078; doi:10.1186/s12870-014-0269-4), 2014-12-16

**Additional File 4 - Phylogenetic trees for the carotenogenesis-related proteins from *L. barbarum* (Lb), *L. ruthenicum* (Lr) and other organisms.**

(a)

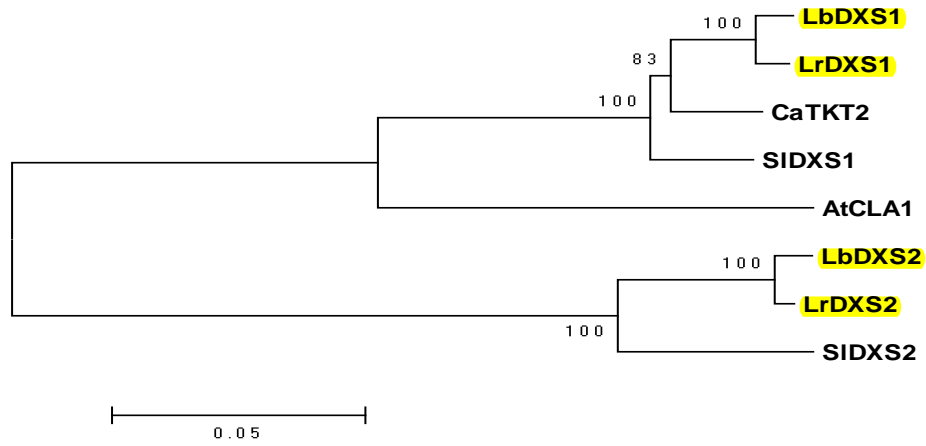

(b)

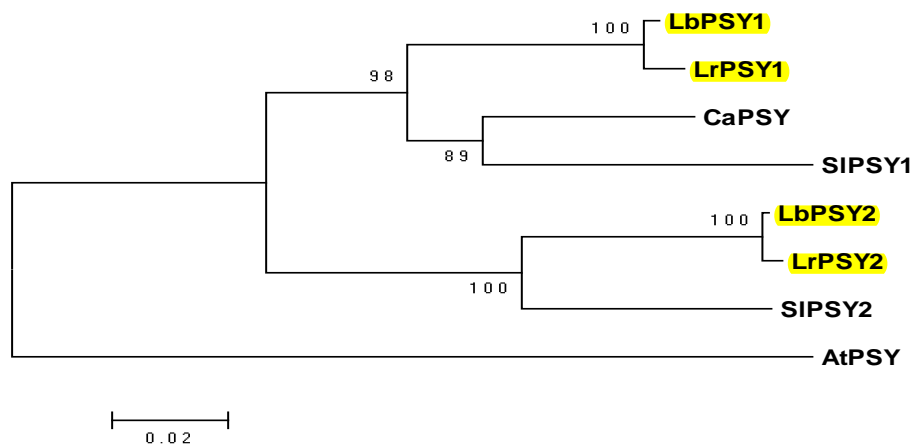

(c)

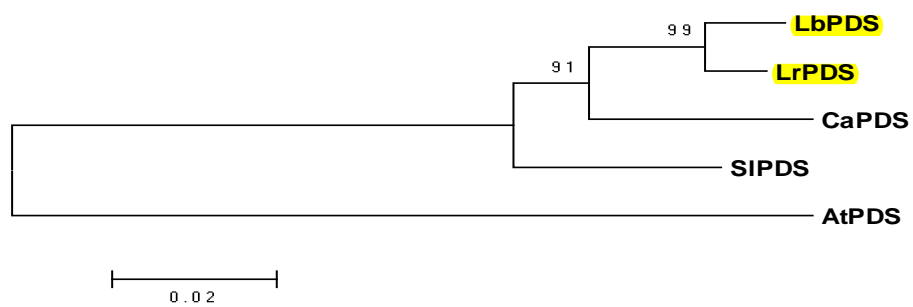

(d)

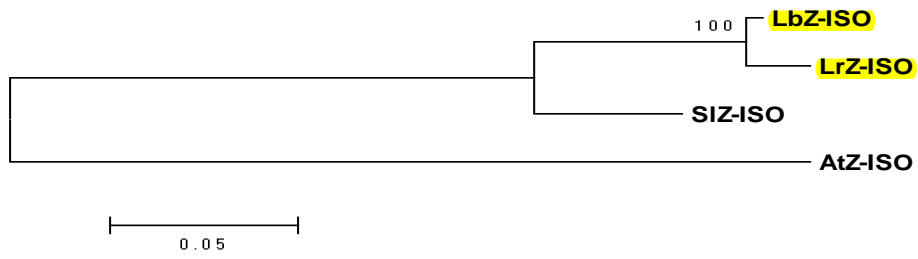

(e)

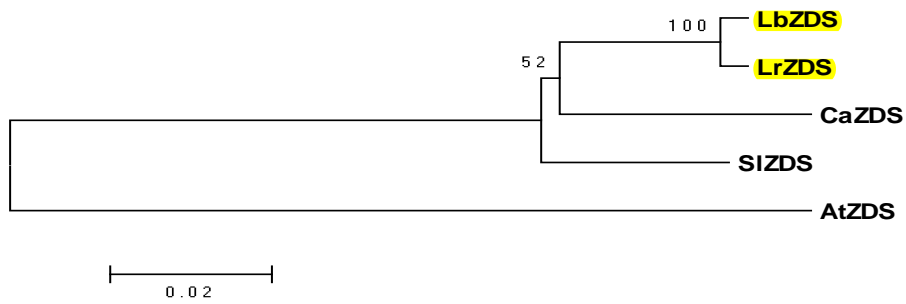

(f)

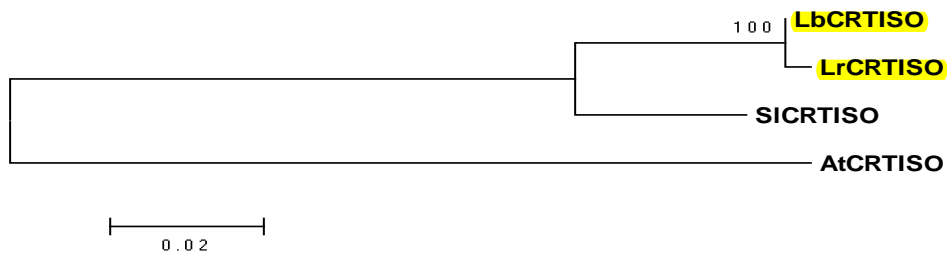

(g)

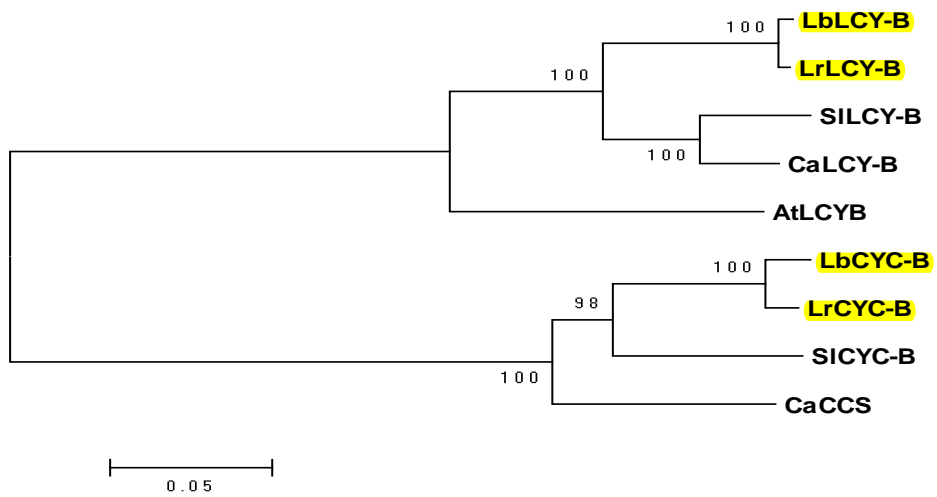

(h)

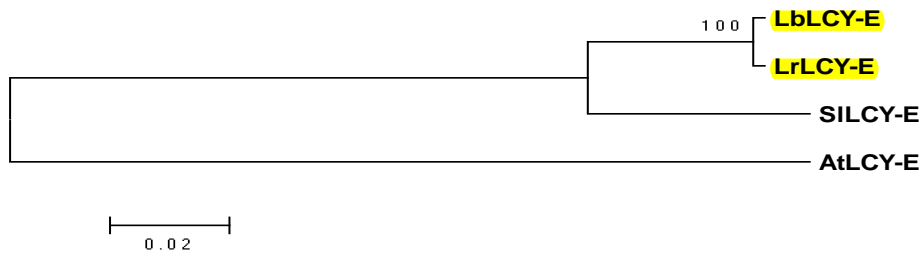

(i)

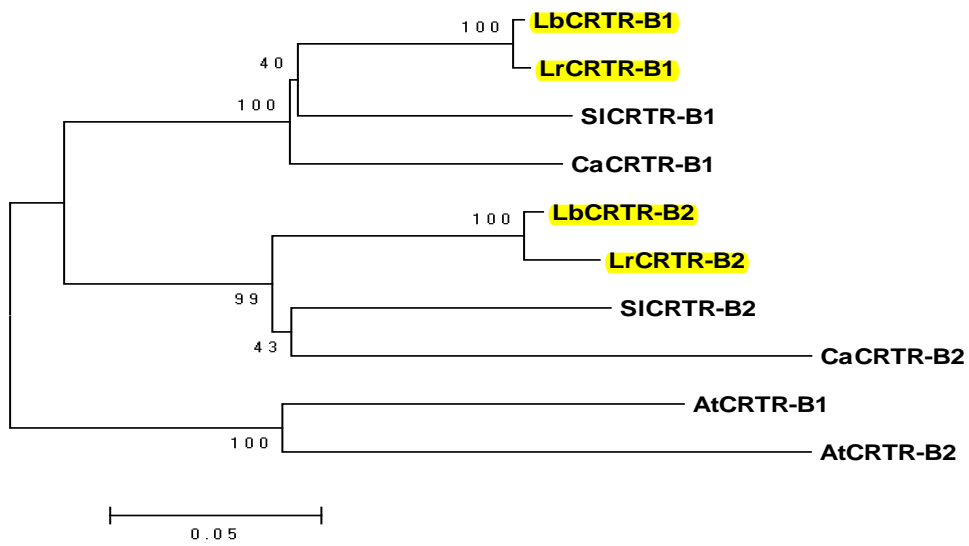

(j)

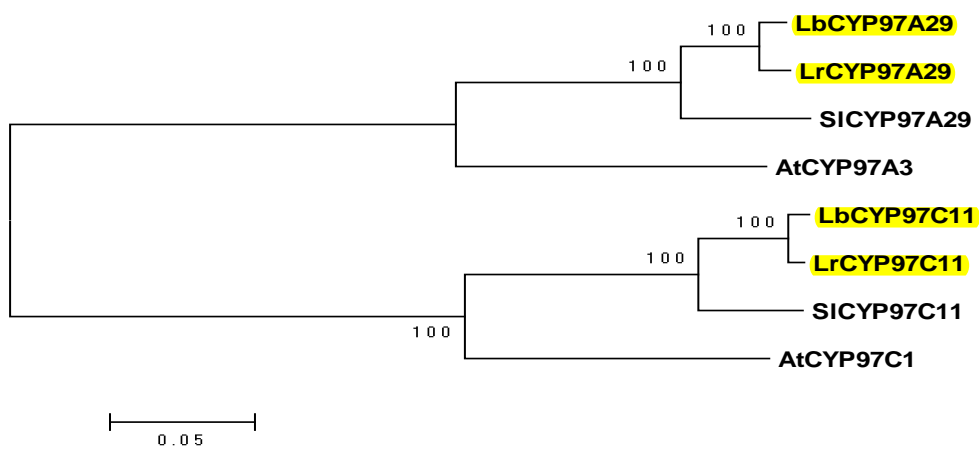

(k)

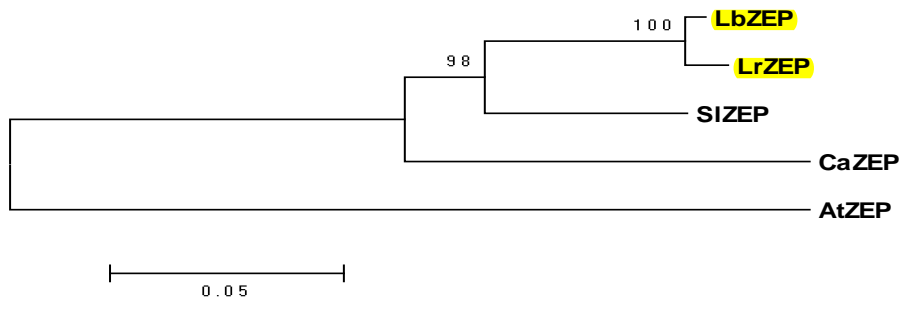

(l)

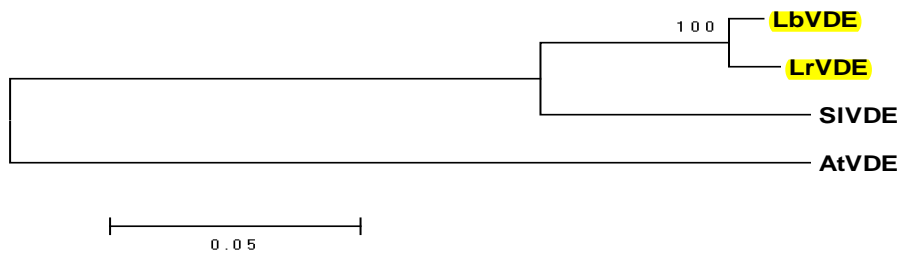

(m)

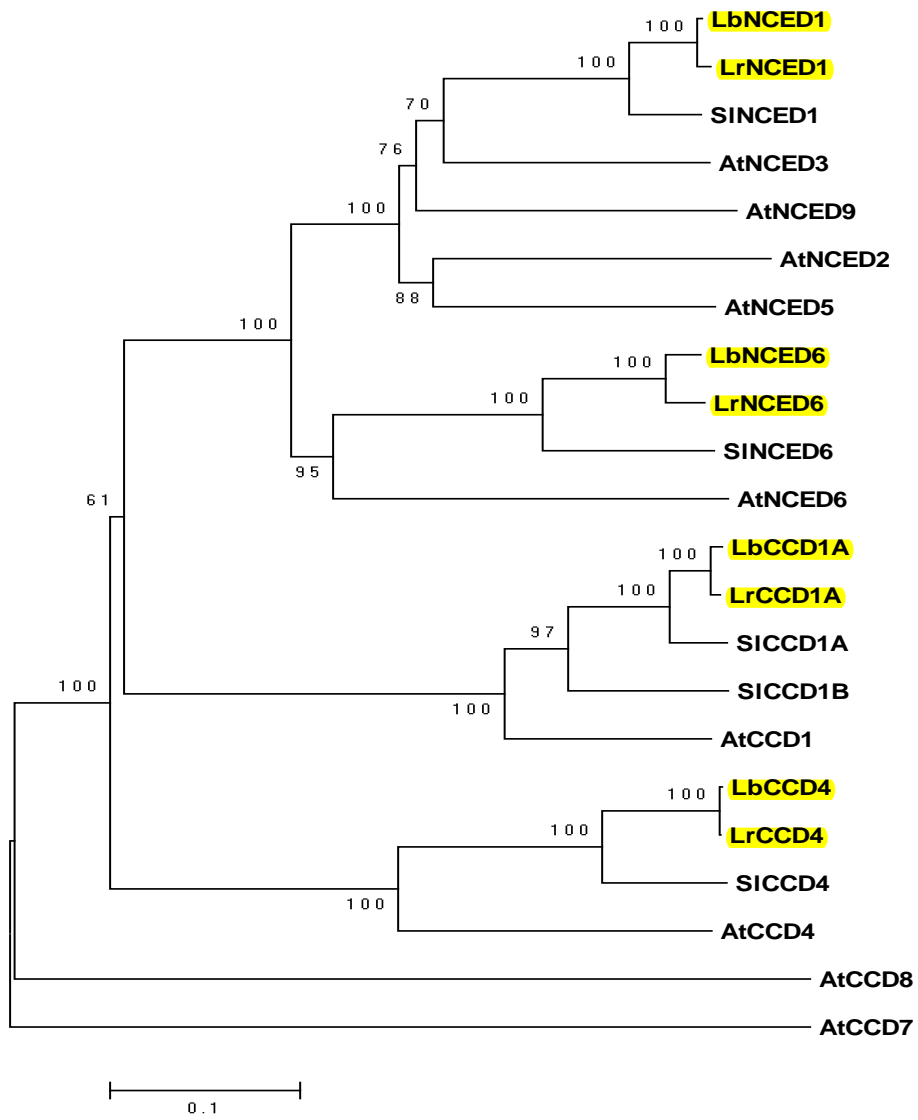

(n)

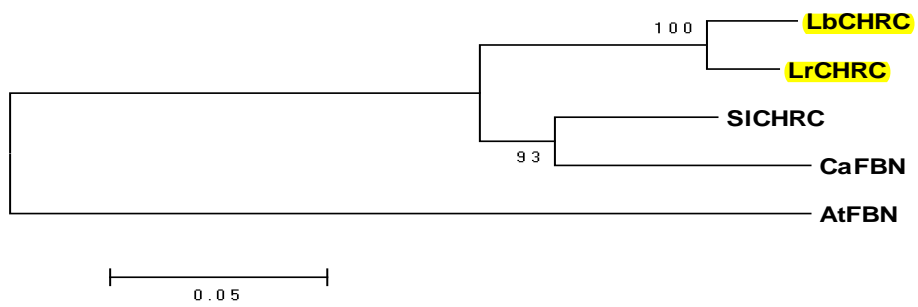

(o)

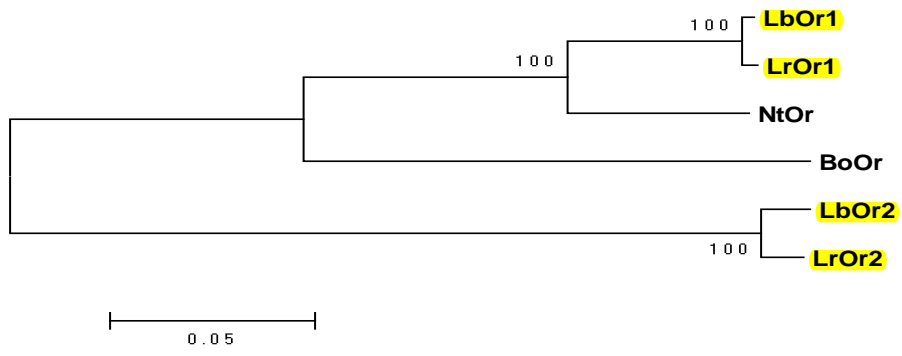

(p)

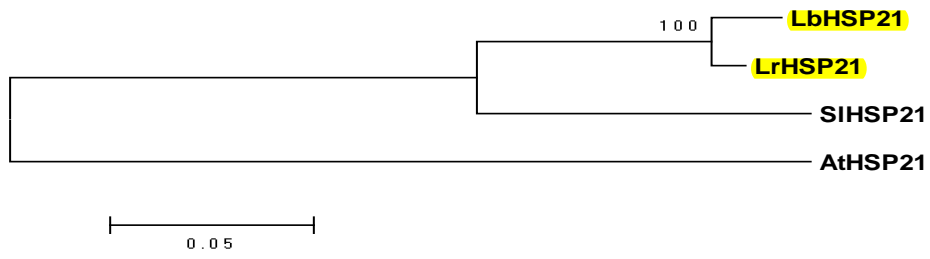

Supplement: 12870_2014_269_MOESM4_ESM.pdf [file 12870_2014_269_MOESM4_ESM.pdf]
