# Supplementary material for: Comparative analysis of carotenoid accumulation in two goji (Lycium barbarum L. and L. ruthenicum Murr.) fruits
Source: PubMed Central journal article supplement (PMC4276078; doi:10.1186/s12870-014-0269-4), 2014-12-16
Supplement: 12870_2014_269_MOESM1_ESM.pdf [file 12870_2014_269_MOESM1_ESM.pdf]

**Additional file 1 - Carotenoid concentrations ( $\mu\text{g g}^{-1}$  fresh weight) in all four developmental stages (S1-S4) of *L. barbarum* and *L. ruthenicum* fruits.**

| <b>Compound</b>                | <b>S1</b>        | <b>S2</b>        | <b>S3</b>          | <b>S4</b>          |
|--------------------------------|------------------|------------------|--------------------|--------------------|
| <b><i>L. barbarum</i></b>      |                  |                  |                    |                    |
| Zeaxanthin                     | ND               | ND               | 77.16 $\pm$ 28.26  | 381.60 $\pm$ 26.78 |
| $\beta$ -Cryptoxanthin         | ND               | ND               | 3.00 $\pm$ 0.05    | 17.59 $\pm$ 4.81   |
| $\beta$ -Carotene              | 12.91 $\pm$ 2.29 | 10.18 $\pm$ 2.76 | 16.70 $\pm$ 3.45   | 28.99 $\pm$ 6.46   |
| Total carotenoids <sup>a</sup> | 44.36 $\pm$ 2.38 | 21.70 $\pm$ 3.23 | 105.36 $\pm$ 28.26 | 508.90 $\pm$ 20.31 |
| <b><i>L. ruthenicum</i></b>    |                  |                  |                    |                    |
| Zeaxanthin                     | ND               | ND               | ND                 | ND                 |
| $\beta$ -Cryptoxanthin         | ND               | ND               | ND                 | ND                 |
| $\beta$ -Carotene              | 18.01 $\pm$ 1.04 | 8.48 $\pm$ 0.65  | 3.22 $\pm$ 0.44    | ND                 |
| Total carotenoids <sup>a</sup> | 34.46 $\pm$ 2.18 | 25.97 $\pm$ 2.00 | 9.57 $\pm$ 2.00    | 0.01 $\pm$ 0.00    |

<sup>a</sup>Only three major carotenoids (zeaxanthin,  $\beta$ -cryptoxanthin and  $\beta$ -carotene) were quantified for the HPLC results, while the total amount of carotenoids was measured by spectrophotometer method.
