# Supplementary material for: Comparative analysis of carotenoid accumulation in two goji (Lycium barbarum L. and L. ruthenicum Murr.) fruits
Source: PubMed Central journal article supplement (PMC4276078; doi:10.1186/s12870-014-0269-4), 2014-12-16
Supplement: 12870_2014_269_MOESM9_ESM.pdf [file 12870_2014_269_MOESM9_ESM.pdf]

Additional file 9 - Specific primers used for gene cloning and qRT-PCR.

| Target gene                  | For gene clone (5'-3')                                          | For qRT-PCR (5'-3')                                            |
|------------------------------|-----------------------------------------------------------------|----------------------------------------------------------------|
| <i>LbDXS1/LrDXS1</i>         | F: ATGGCTTTGTGTGCATATGC<br>R: TTATGTCATGATCTCTAGAGCTTCTC        | F: TCATCAATGGCAGCAGCAGT<br>R: AGAGCAGGTCTTGTGGAGC              |
| <i>LbDXS2/LrDXS2</i>         | F: ATGGCAGTTTCTTCAGGTCC<br>R: TTAATTTACTACCATAGCTTCCTTTG        | F: AGTATTCTTCCCTTACCAACCTC<br>R: GTAGCGTACATGGCTTGTTTG         |
| <i>LbPSY1/LrPSY1</i>         | F: ATGTCTGTTGCCTTGGCACAG<br>R: CATGCCTTAGCTTAGAGGAGAC           | F: TGCTGGAGAAATGACGACGATG<br>R: GTCCAAATTTCCCGAATAGGTATG       |
| <i>LbPSY2/LrPSY2</i>         | F: ATGAGCATGTCTGTGTGCTTTGTTG<br>R: TCATGTCTTTGCTTGTGGAGAAG      | F: ACAGGAATTCTATGTGGAAGGGGGAG<br>R: CCAAAGTGGACTGTGTAGAAAACTGC |
| <i>LbPDS/LrPDS</i>           | F: TGTAGGTAAGTCCAAACCAC<br>R: TGATTAAAGAATGCTAATCTTCAA          | F: TGCTTGGTGGGCAATCTTATG<br>R: TGACATGGCGATGAACACCTC           |
| <i>LbCRTISO/LrCRTISO</i>     | F: ATGGGTACCTTGAATTTTATGTTTC<br>R: GTCTCATGTAGTGTCTTAAACCA      | F: GAATGCCACCAGATGGGATAC<br>R: CTGGTGGGAGAACATCTGCTT           |
| <i>LbZDS/LrZDS</i>           | F: ATGGCTACTTCTCAGCTTATTTTTG<br>R: TTAGACAAGACTCAACTCATCAGATAGC | F: TCAATGTGCTTACGCCTGG<br>R: ACTGATGACCAGGTAACCTCAAGAC         |
| <i>LbZ-ISO/LrZ-ISO</i>       | F: ATGGCCACTTCAATTTTTCTCTCA<br>R: CTACCAGTGTAGCCGATAACTGG       | F: GGACCGAAGGTTAGCAATACG<br>R: CCTTGTAAATAATCTTCGGGCAAC        |
| <i>LbLCY-B/LrLCY-B</i>       | F: ATGGATACACTGTTGAAAACCCC<br>R: CTCCTGATAAGTTATTCTGAATCCTG     | F: TCAAGAAAAGATGGTGGCTCG<br>R: CACTCTCTGAGGTAATACCGGAAG        |
| <i>LbCYC-B/LrCYC-B</i>       | F: ATGGAACTCTTCTCAGGCC<br>R: TCAAAGGCTCTCTACTGCTAG              | F: TGACCCTTCAACTTTCCA<br>R: TTCTTCATGCTTCACCTCCC               |
| <i>LbLCY-E/LrLCY-E</i>       | F: ATGGAGTGTGTTGGAGTTCAAA<br>R: GGCCTCTGTCTGAAAGAGAACA          | F: TGCGAGGGTGACATTGTGATTG<br>R: TTATCGACCTCAACCTCCACTCC        |
| <i>LbCRTR-B1/Lr CRTR-B1</i>  | F: ATGGCAGCCGCCAGAATTTCC<br>R: CCAATCATTATGATCCCTTTG            | F: TGAAGAGTTGAAAAGGAAGTG<br>R: GTGATAGGAGTATTATCAACAATGACC     |
| <i>LbCRTR-B2/LrCRTR-B2</i>   | F: CTGCAAGGTGTCCACACAGTAAG<br>R: GCTAGAGCCTAATTACAGGTACATG      | F: GTAGGAGGACTTGAGGAGTTGGA<br>R: GCTAGAGCCTAATTACAGGTACATG     |
| <i>LbCYP97A29/LrCYP97A29</i> | F: ATGGCTGCTTCTGTTCCTCTTC<br>R: TTATGATCGAACACTAGAAGCTTCG       | F: TTCCGGTTGACTTTTGGTG<br>R: ACACGCCAAATTTCTCCATC              |
| <i>LbCYP97C11/LrCYP97C11</i> | F: ATGCCATTTTCACTCACCATATCT<br>R: TTACAGAGCAGCAGCCAAAACA        | F: AGTTGACAGAGTTTTGGGAGGAC<br>R: AGGACAGGTGGATGTGGATAGA        |
| <i>LbZEP/LrZEP</i>           | F: ATGTATTCAACTGTCTTTTACAC<br>R: TTCCCGTTTATATCAGGTCA           | F: TGCTGATGGCATAAGGTCTAAGG<br>R: AACGAAGTACTGTTTGTGGCCC        |
| <i>LbVDE/LrVDE</i>           | F: ATGGCTCTCGCCCCCTAAT<br>R: CTACCTTAATTTCTTATTGGTAATGC         | F: GCAACAATAGACCTGATGAAACGG<br>R: TTCACCCACATCAGATTACGAGG      |
| <i>LbNCED1/LrNCED1</i>       | F: ATGGCCACTTCTTCTCCTGCTA<br>R: TTAGGCCTGATTTGCCAAGTCT          | F: ATGATTTCCGGATAACGGAG<br>R: ACAATCAGGCACCTTCAACCC            |
| <i>LbNCED6/LrNCED6</i>       | F: ATGTCTTTTCTCATCTCCACCGT<br>R: AACAAGAAGAAGATTGATTACATAAATC   | F: CCGGTTTTTCTTAAACCGAT<br>R: TTGCATCAACCAAACAAAA              |
| <i>LbCCD1A/LrCCD1A</i>       | F: ATGGGGAGAAAAGAAGATGATGA<br>R: TCACAGCTTGGCTTGTCTTGA          | F: GCTTTTGGCACTTTCAGAGG<br>R: ACGGTGGGGTGTGAGAGTAG             |
| <i>LbCCD4/LrCCD4</i>         | F: GCCTTACTCCTCACTCTCCTACTC<br>R: CCTGCCAATTCATTCATCAC          | F: TGCCAAAGGTAACAGGGGTAG<br>R: GAAGGAGCCTTCTCCAAATAGTC         |

---

|                        |                                                            |                                                        |
|------------------------|------------------------------------------------------------|--------------------------------------------------------|
| <i>LbCHRC/LrCHRC</i>   | F: ATGGCTTCCATCTCTTCTCTCAATC<br>R: TTAAGGCTTCAAGAGGGGACTGC | F: TCCATTTCAAATCAACCACCAA<br>R: AAACACTGCCTGCATCTCCTCT |
| <i>LbOr1/LrOr1</i>     | F: ATGGTGTGGGCAGGTAGAATG<br>R: TTAATCGAAGGGATCAATTCG       | F: CTGCATTGATGGTTGTTGAAATC<br>R: TGACAGAGGGTTGTCCGCTC  |
| <i>LbOr2/LrOr2</i>     | F: ATGGGCTCTATGTTTTTTTGC<br>R: TTAATCAAATGGATCTATACGAAGG   | F: GAAGCTAACAACGTGGTCCAA<br>R: TTAAGAGATGGTACACGCAACG  |
| <i>LbHSP21/LrHSP21</i> | F: TGGCAATCACCCTCCTCA<br>R: GGAAAGGGAAACAGGAAGAGC          | F: GACAGACTATTCGAAGATGCC<br>R: ATTTCCACGGATACTTTCACG   |
| <i>LbACTIN/LrACTIN</i> |                                                            | F: CAATCGGGTATTTCAAGGTCAAG<br>R: GAGCAGTGTTTCCCAGCATTG |

---
